# Supplementary material for: Valorization of Invasive Plants from Macaronesia as Filler Materials in the Production of Natural Fiber Composites by Rotational Molding
Source: MDPI journal article supplement (doi:10.3390/polym13132220), 2021-07-05
Supplement: s1 [file s1]

## Supporting information:

# Valorization of Invasive Plants from Macaronesia as Filler Materials in the Production of Natural Fiber Composites by Rotational Molding

Zaida Ortega <sup>1,\*</sup>, Francisco Romero <sup>2</sup>, Rubén Paz <sup>2</sup>, Luis Suárez <sup>2</sup>, Antonio Nizardo Benítez <sup>1</sup> and María Dolores Marrero <sup>2</sup>

<sup>1</sup> Departamento de Ingeniería de Procesos, Universidad de Las Palmas de Gran Canaria, post code Las Palmas, Spain; antonionizardo.benitez@ulpgc.es

<sup>2</sup> Departamento de Ingeniería Mecánica, Universidad de Las Palmas de Gran Canaria, post code Las Palmas, Spain; francisco.romero@ulpgc.es (F.R.); ruben.paz@ulpgc.es (R.P.); luis.suarez@ulpgc.es (L.S.); mariadolores.marrero@ulpgc.es (M.D.M.)

\* Correspondence: zaida.ortega@ulpgc.es

**Table S1.** Mechanical properties of rotomolded composites (PE matrix and 20 % fiber). A, B, C, D refers to different fiber sizes distribution: A (> 250 µm), B (125 – 250 µm), C (75 – 125 µm) and D (< 75 µm).

| COMPOSITE     | DENSITY<br>(g/cm <sup>3</sup> ) | IMPACT<br>Strength<br>(kJ/m <sup>2</sup> ) | TENSILE (MPa)        |               |                   | FLEXURAL (MPa)       |                |                   |
|---------------|---------------------------------|--------------------------------------------|----------------------|---------------|-------------------|----------------------|----------------|-------------------|
|               |                                 |                                            | Ultimate<br>strength | E             | Yield<br>strength | Ultimate<br>strength | E <sub>f</sub> | Yield<br>strength |
| R.PE.         | 0,901                           | 17,6 ± 1,1                                 | 16,1 ± 0,1           | 395,4 ± 71,2  | 7,2 ± 1,3         | 18,7 ± 2,1           | 661,2 ± 120,7  | 9,0 ± 1,7         |
| R.PE.AD.20.A  | 0,720                           | 8,5 ± 1,67                                 | 12,2 ± 0,16          | 382,7 ± 46,08 | 3,7 ± 0,72        | 12,4 ± 1,14          | 637,1 ± 72,05  | 6,2 ± 0,95        |
| R.PE.AD.20.B  | 0,654                           | 4,6 ± 0,69                                 | 7,9 ± 0,82           | 314,9 ± 30,09 | 5,0 ± 0,69        | 10,9 ± 1,08          | 515,1 ± 44,52  | 6,3 ± 0,75        |
| R.PE.AD.20.C  | 0,562                           | 2,6 ± 0,88                                 | 4,7 ± 0,80           | 217,5 ± 36,25 | 2,1 ± 0,75        | 6,3 ± 3,24           | 336,1 ± 143,15 | 3,1 ± 1,22        |
| R.PE.AD.20.D  | 0,589                           | 1,7 ± 0,64                                 | 3,9 ± 2,03           | 179,0 ± 89,12 | 1,6 ± 0,74        | 5,2 ± 4,14           | 219,8 ± 166,18 | 2,8 ± 2,26        |
| R.PE.ADt.20.A | 0,785                           | 9,5 ± 1,39                                 | 12,9 ± 0,37          | 430,4 ± 21,56 | 5,3 ± 1,64        | 14,3 ± 1,41          | 721,8 ± 78,66  | 6,9 ± 0,98        |
| R.PE.ADt.20.B | 0,731                           | 7,0 ± 1,44                                 | 9,9 ± 0,74           | 392,4 ± 6,29  | 5,7 ± 0,64        | 13,2 ± 1,14          | 677,8 ± 127,12 | 7,6 ± 0,09        |
| R.PE.ADt.20.C | 0,569                           | 2,7 ± 0,61                                 | 5,1 ± 1,16           | 229,7 ± 46,17 | 3,4 ± 0,72        | 6,9 ± 2,28           | 389,3 ± 103,67 | 3,9 ± 1,24        |
| R.PE.ADt.20.D | 0,613                           | 2,5 ± 1,09                                 | 4,8 ± 1,92           | 224,8 ± 96,90 | 2,6 ± 1,07        | 5,9 ± 3,19           | 263,6 ± 143,59 | 3,2 ± 1,80        |
| R.PE.PS.20.A  | 0,515                           | 3,3 ± 0,57                                 | 5,5 ± 0,32           | 249,5 ± 31,85 | 1,7 ± 0,21        | 5,9 ± 0,68           | 268,1 ± 36,16  | 3,4 ± 0,64        |
| R.PE.PS.20.B  | 0,527                           | 2,5 ± 0,62                                 | 5,2 ± 0,46           | 224,1 ± 34,39 | 2,7 ± 0,91        | 5,0 ± 0,10           | 266,4 ± 13,29  | 2,8 ± 0,20        |
| R.PE.PS.20.C  | 0,527                           | 1,8 ± 0,36                                 | 3,8 ± 0,48           | 202,7 ± 36,86 | 1,5 ± 0,34        | 4,3 ± 1,84           | 214,2 ± 58,77  | 2,5 ± 1,06        |
| R.PE.PS.20.D  | 0,496                           | 1,2 ± 0,62                                 | 1,6 ± 1,35           | 81,2 ± 51,93  | 0,5 ± 0,33        | 1,8 ± 1,40           | 74,1 ± 64,55   | 1,1 ± 0,77        |
| R.PE.PSt.20.A | 0,755                           | 8,1 ± 1,11                                 | 11,6 ± 0,41          | 389,4 ± 30,97 | 4,5 ± 1,31        | 13,2 ± 1,44          | 583,4 ± 42,37  | 6,7 ± 1,33        |
| R.PE.PSt.20.B | 0,775                           | 8,4 ± 1,13                                 | 11,9 ± 0,58          | 424,6 ± 43,45 | 6,1 ± 1,03        | 14,4 ± 1,67          | 681,4 ± 95,69  | 7,3 ± 0,70        |
| R.PE.PSt.20.C | 0,707                           | 5,3 ± 1,62                                 | 9,0 ± 0,75           | 344,1 ± 14,00 | 4,1 ± 0,92        | 11,9 ± 1,82          | 621,3 ± 103,76 | 5,9 ± 0,31        |
| R.PE.PSt.20.D | 0,633                           | 3,8 ± 0,32                                 | 6,8 ± 0,57           | 264,1 ± 26,07 | 4,0 ± 1,26        | 8,5 ± 1,43           | 457,0 ± 16,70  | 4,3 ± 0,32        |
| R.PE.RC.20.A  | 0,595                           | 3,6 ± 1,19                                 | 7,6 ± 1,15           | 266,9 ± 25,29 | 1,6 ± 0,35        | 6,7 ± 3,88           | 226,0 ± 131,17 | 3,5 ± 2,38        |
| R.PE.RC.20.B  | 0,524                           | 1,9 ± 0,28                                 | 4,2 ± 0,54           | 210,6 ± 32,46 | 1,5 ± 0,28        | 4,5 ± 1,04           | 206,0 ± 52,22  | 2,2 ± 0,26        |
| R.PE.RC.20.C  | 0,503                           | 1,4 ± 0,48                                 | 2,6 ± 0,61           | 146,5 ± 55,23 | 1,1 ± 0,25        | 3,7 ± 1,95           | 169,9 ± 71,89  | 1,7 ± 0,71        |
| R.PE.RC.20.D  | 0,514                           | 1,3 ± 0,5                                  | 1,8 ± 1,48           | 105,3 ± 70,40 | 0,8 ± 0,48        | 2,0 ± 0,99           | 84,8 ± 47,22   | 0,9 ± 0,66        |
| R.PE.RCt.20.A | 0,729                           | 6,6 ± 0,69                                 | 11,4 ± 0,33          | 373,8 ± 28,84 | 3,6 ± 1,31        | 12,6 ± 1,91          | 563,1 ± 105,99 | 6,0 ± 1,37        |
| R.PE.RCt.20.B | 0,526                           | 2,3 ± 0,58                                 | 3,9 ± 0,48           | 192,5 ± 28,63 | 2,2 ± 0,61        | 5,3 ± 1,91           | 252,6 ± 72,35  | 2,3 ± 0,31        |
| R.PE.RCt.20.C | 0,408                           | 0,9 ± 0,35                                 | 1,6 ± 0,81           | 65,5 ± 26,93  | 0,6 ± 0,18        | 1,6 ± 0,71           | 84,4 ± 49,88   | 1,0 ± 0,55        |
| R.PE.RCt.20.D | 0,462                           | 1,1 ± 0,55                                 | 2,0 ± 1,46           | 96,2 ± 65,40  | 0,7 ± 0,40        | 2,6 ± 1,79           | 97,8 ± 64,60   | 1,3 ± 0,91        |

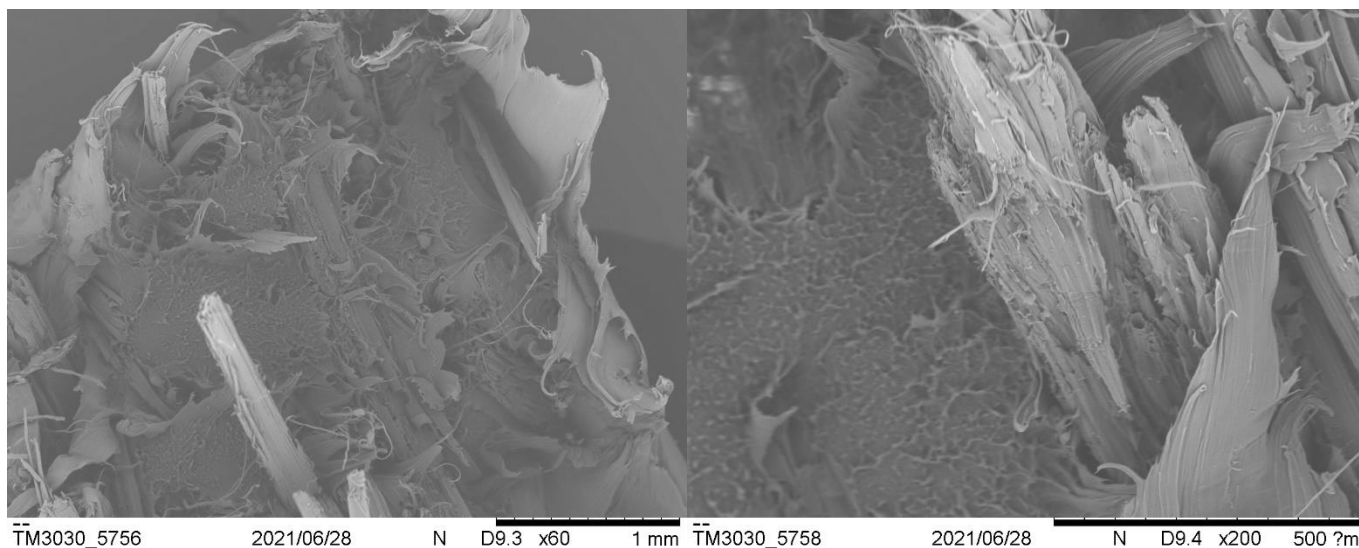

(a)

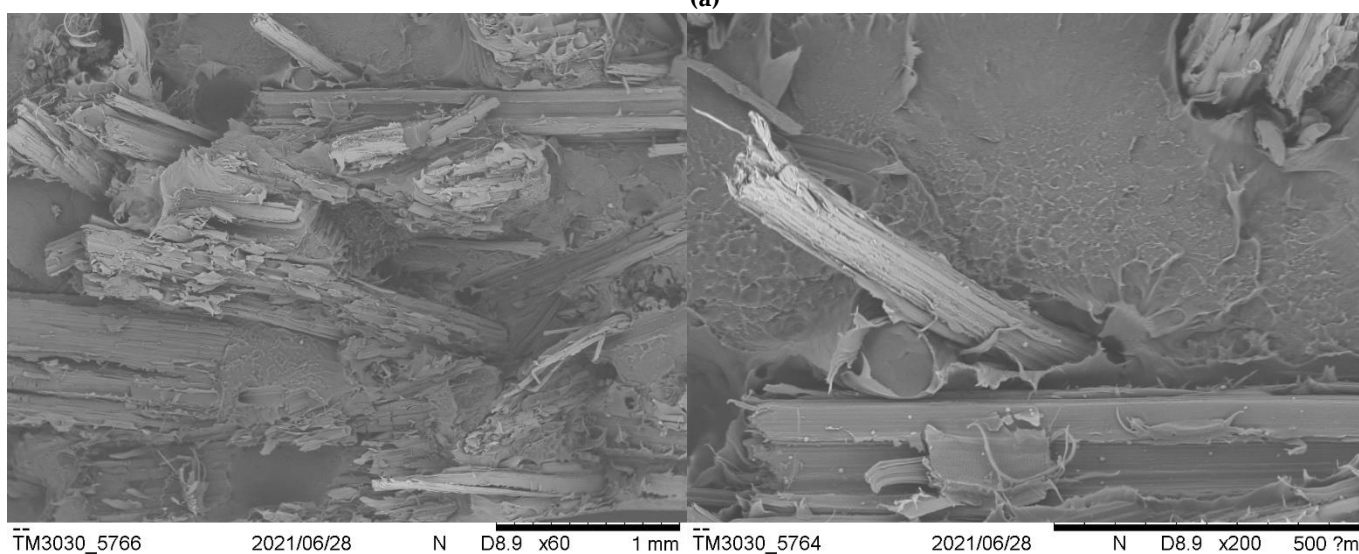

(b)

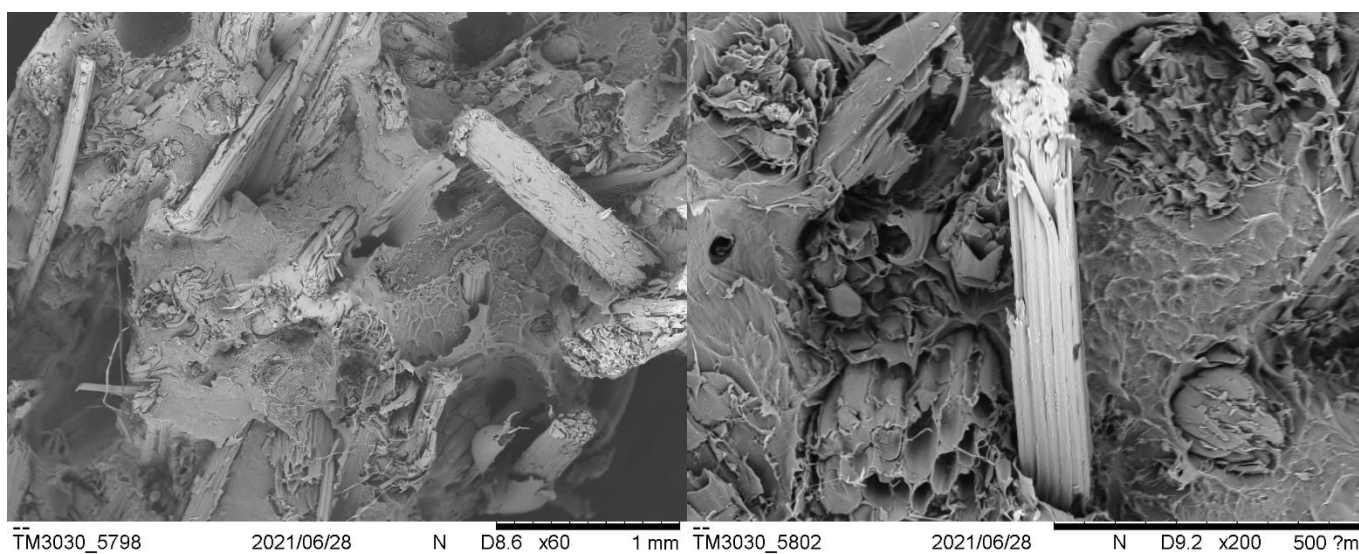

(c)

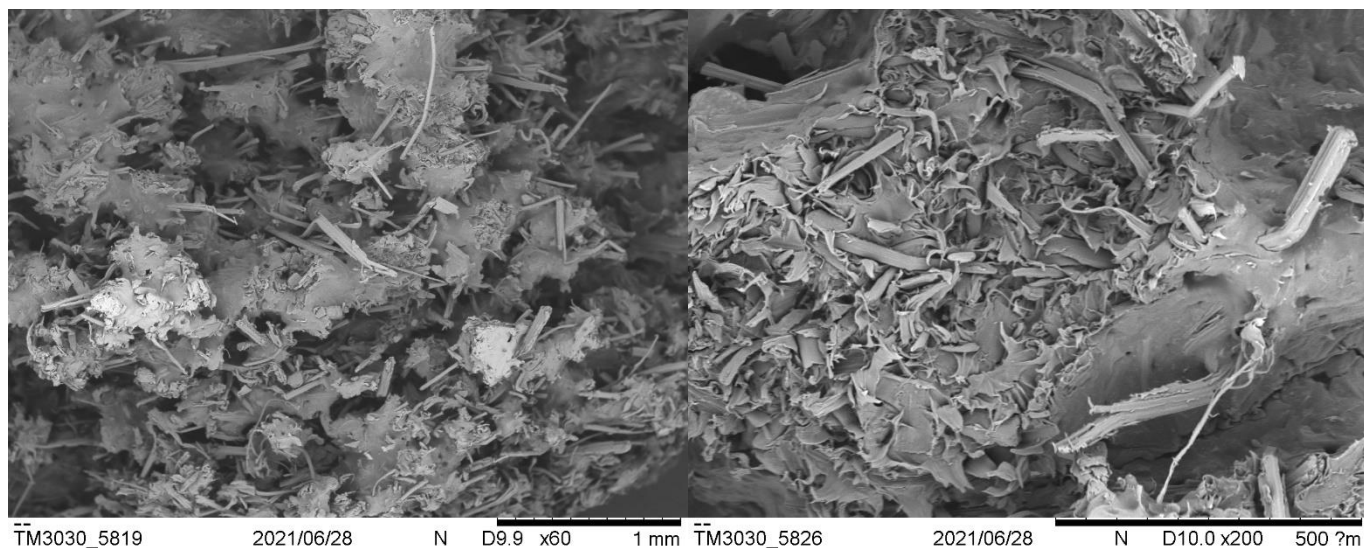

(d)

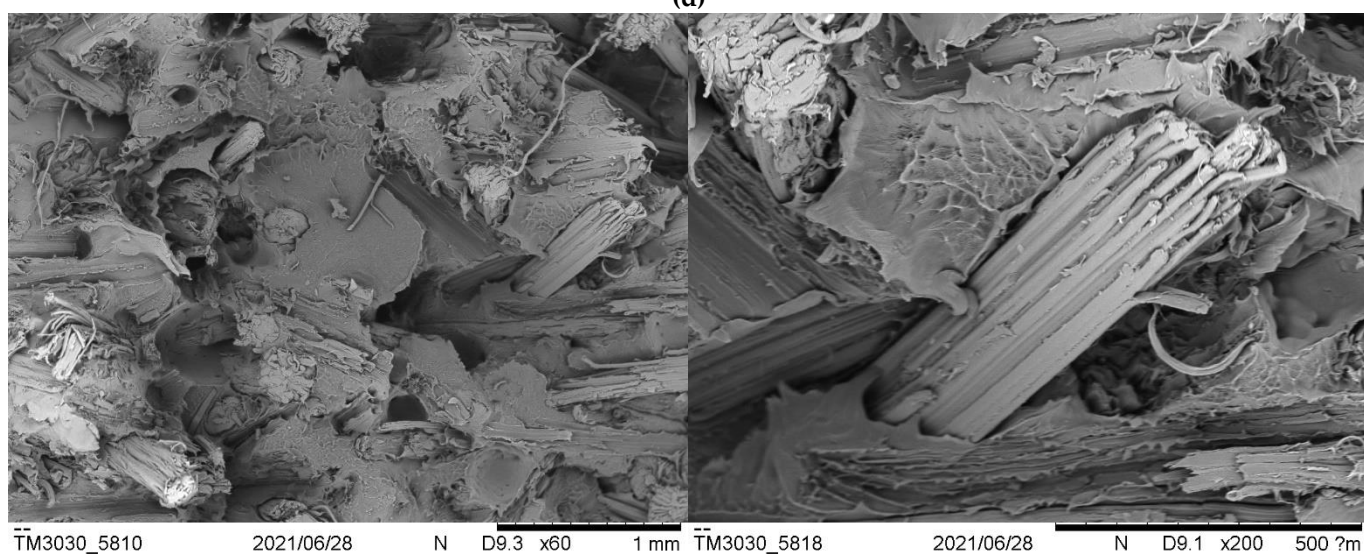

(e)

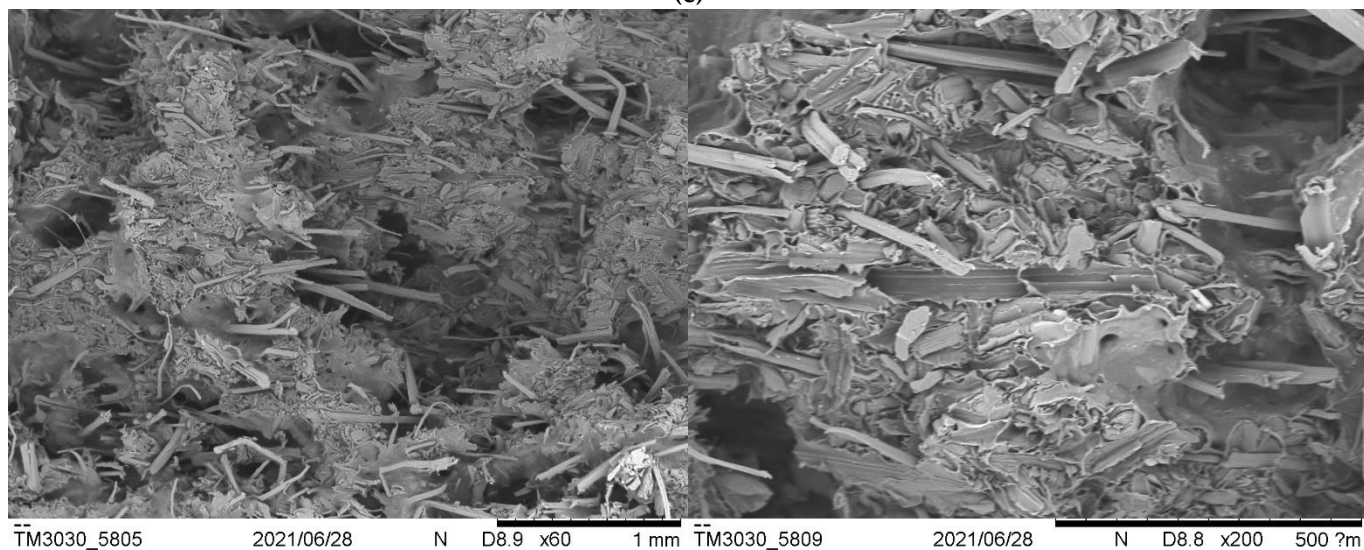

(f)

**Figure S1.** SEM pictures of *Arundo donax* rotomolded composites: (a) 10 % unsieved fiber, (b) 10% unsieved treated fiber, (c) 20% A-fiber ( $> 250 \mu\text{m}$ ), (d) 20% D-fiber ( $< 75 \mu\text{m}$ ), (e) 20% A-treated fiber ( $> 250 \mu\text{m}$ ), (f) 20% D-treated fiber ( $< 75 \mu\text{m}$ )

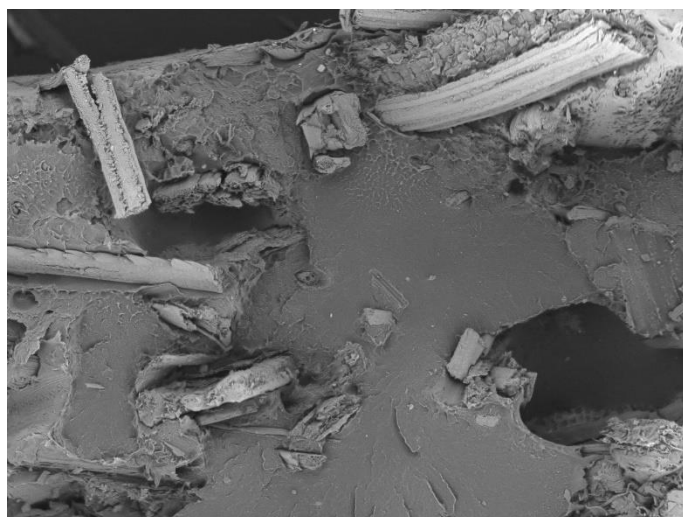

TM3030\_5771

2021/06/28

N

D9.4 x60 1 mm

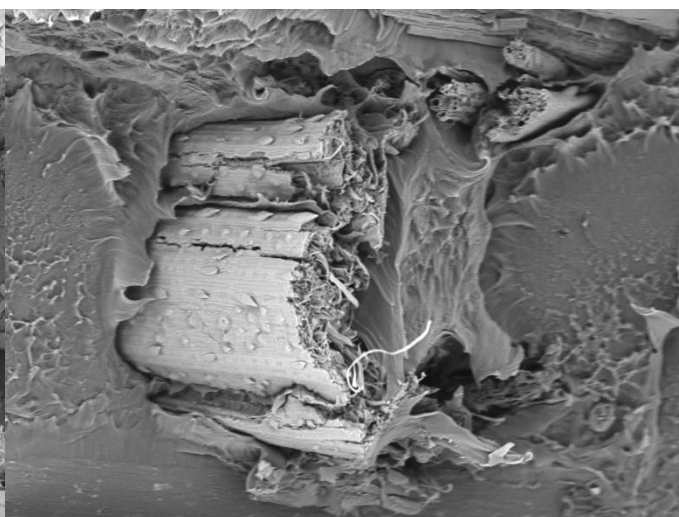

TM3030\_5770

2021/06/28

N

D8.6 x200 500 μm

(a)

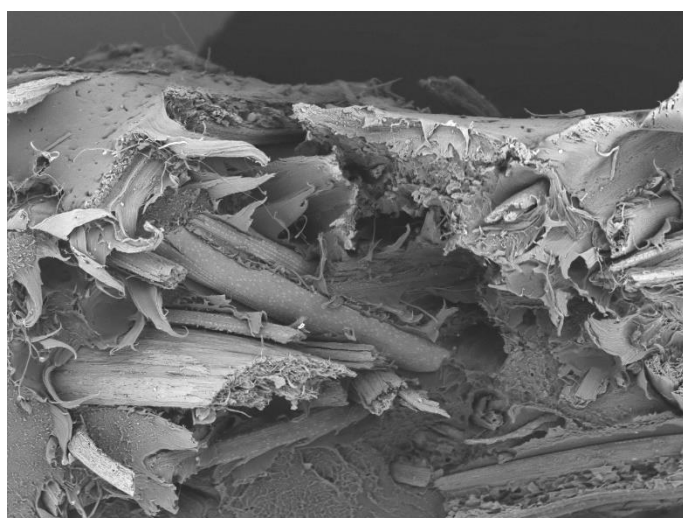

TM3030\_5780

2021/06/28

N

D8.8 x60 1 mm

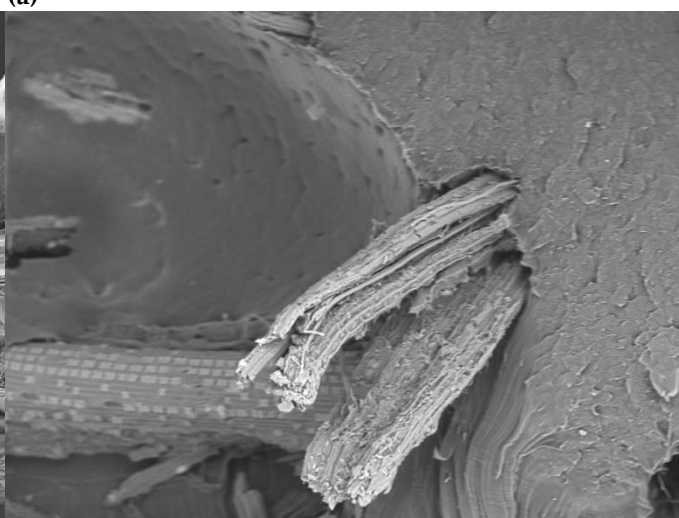

TM3030\_5783

2021/06/28

N

D8.9 x200 500 μm

(b)

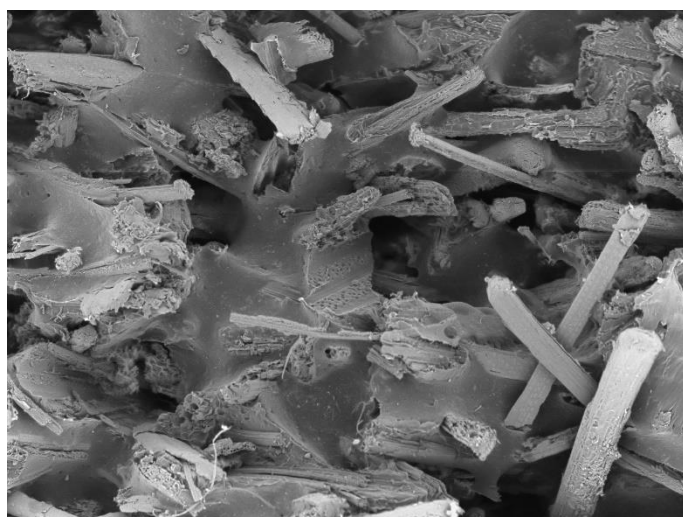

TM3030\_5831

2021/06/29

N

D9.7 x60 1 mm

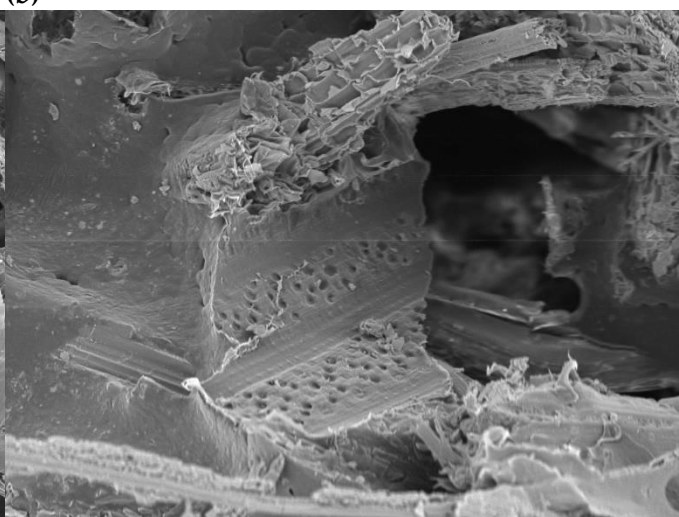

TM3030\_5832

2021/06/29

N

D9.7 x200 500 μm

(c)



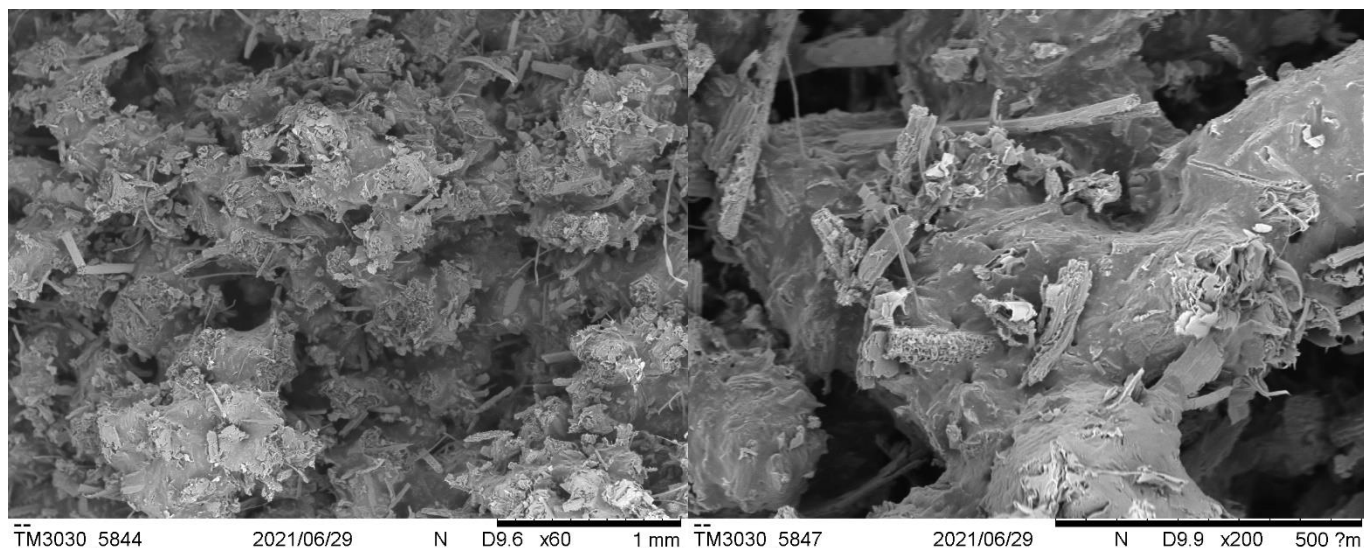

(d)

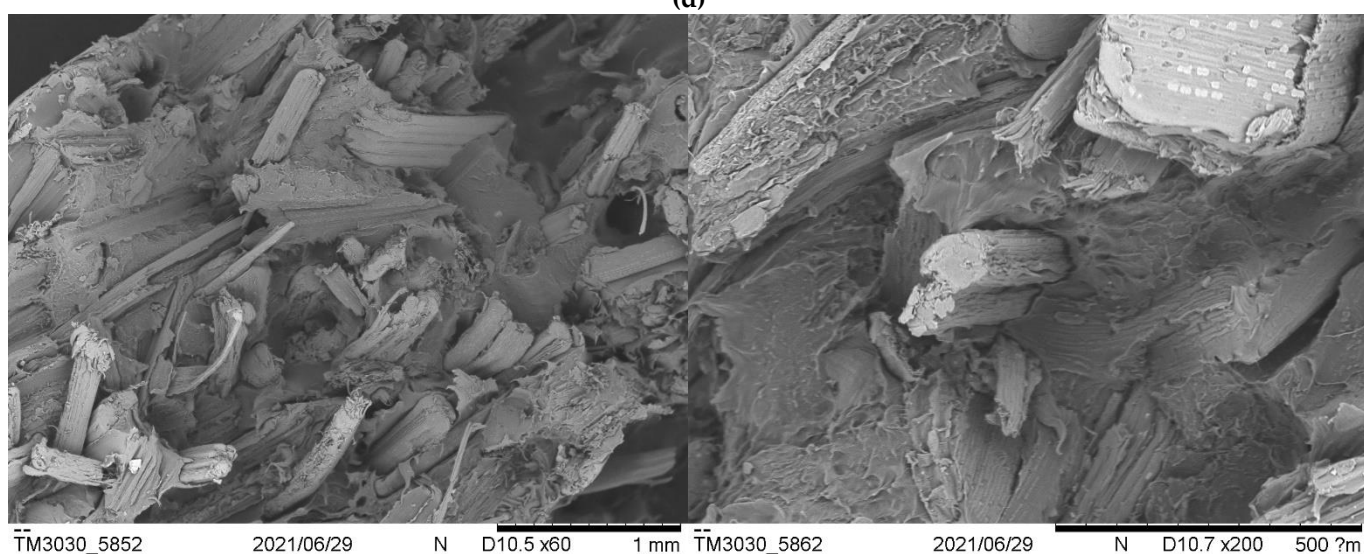

(e)

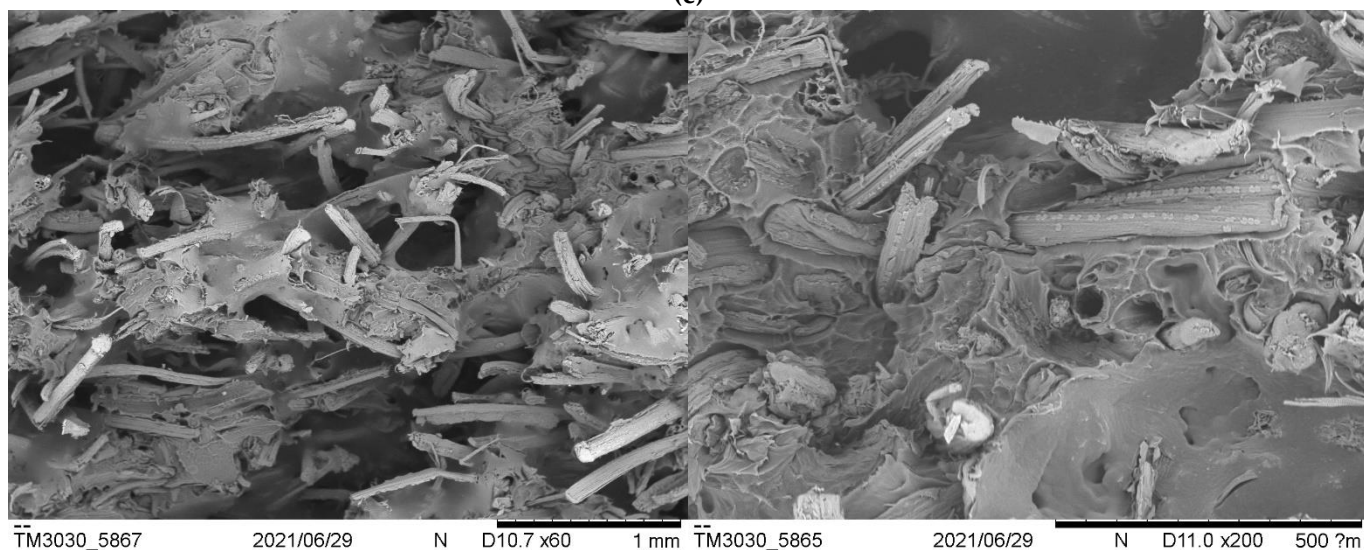

(f)

**Figure S2.** SEM pictures of *Pennisetum setaceum* rotomolded composites: (a) 10 % unsieved fiber, (b) 10% unsieved treated fiber, (c) 20% A-fiber ( $> 250 \mu\text{m}$ ), (d) 20% D-fiber ( $< 75 \mu\text{m}$ ), (e) 20% A-treated fiber ( $> 250 \mu\text{m}$ ), (f) 20% D-treated fiber ( $< 75 \mu\text{m}$ )

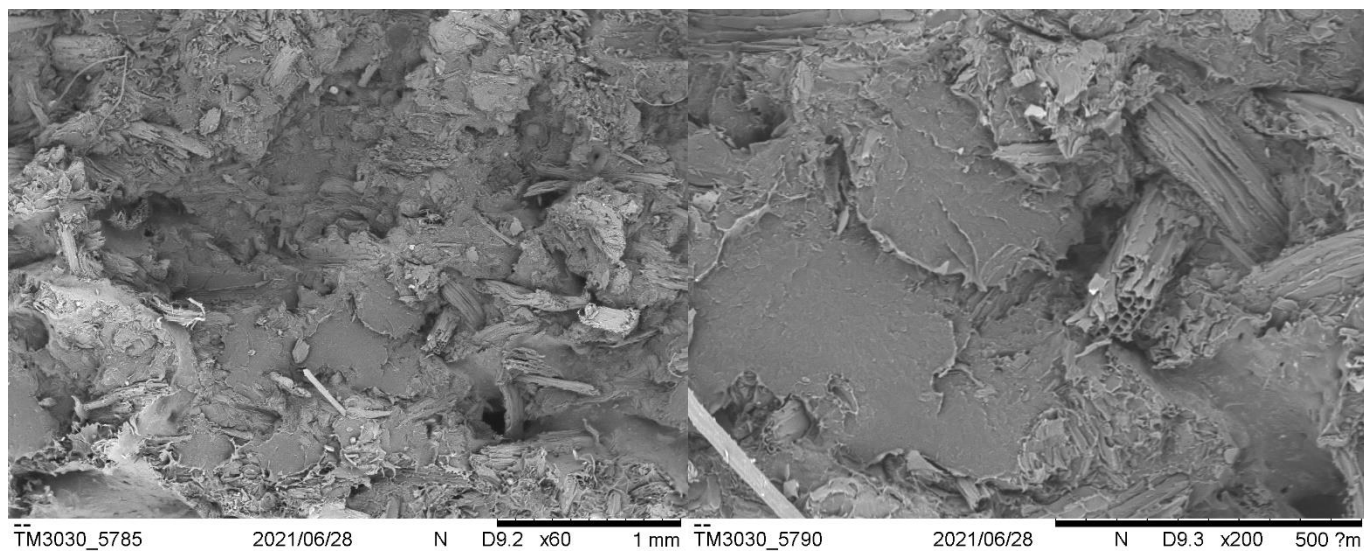

(a)

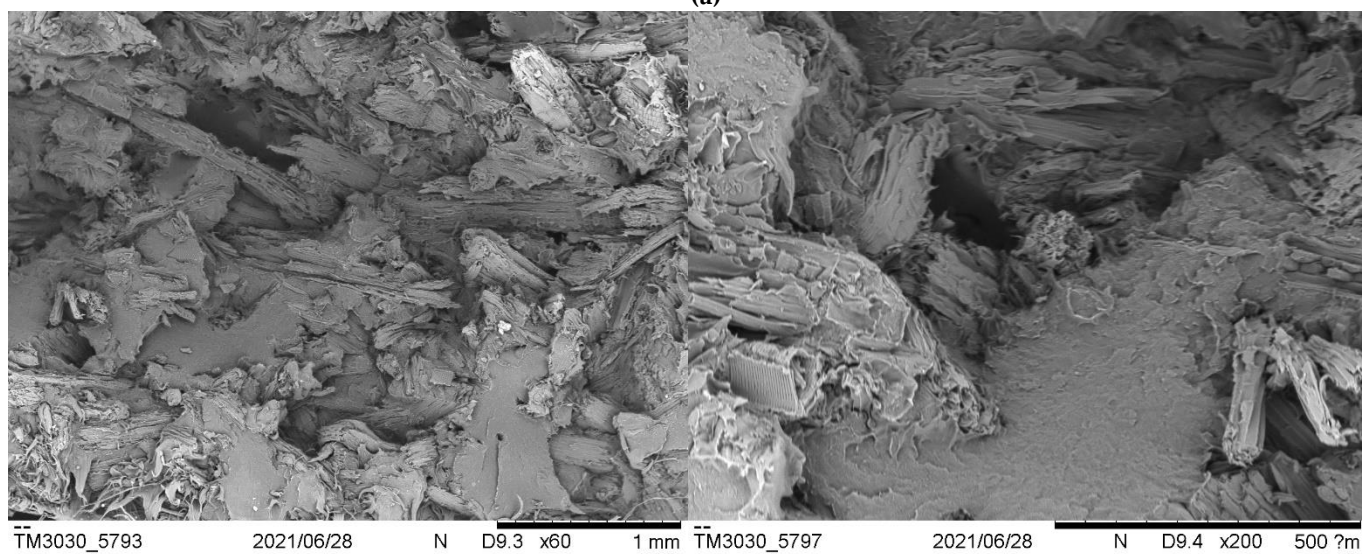

(b)

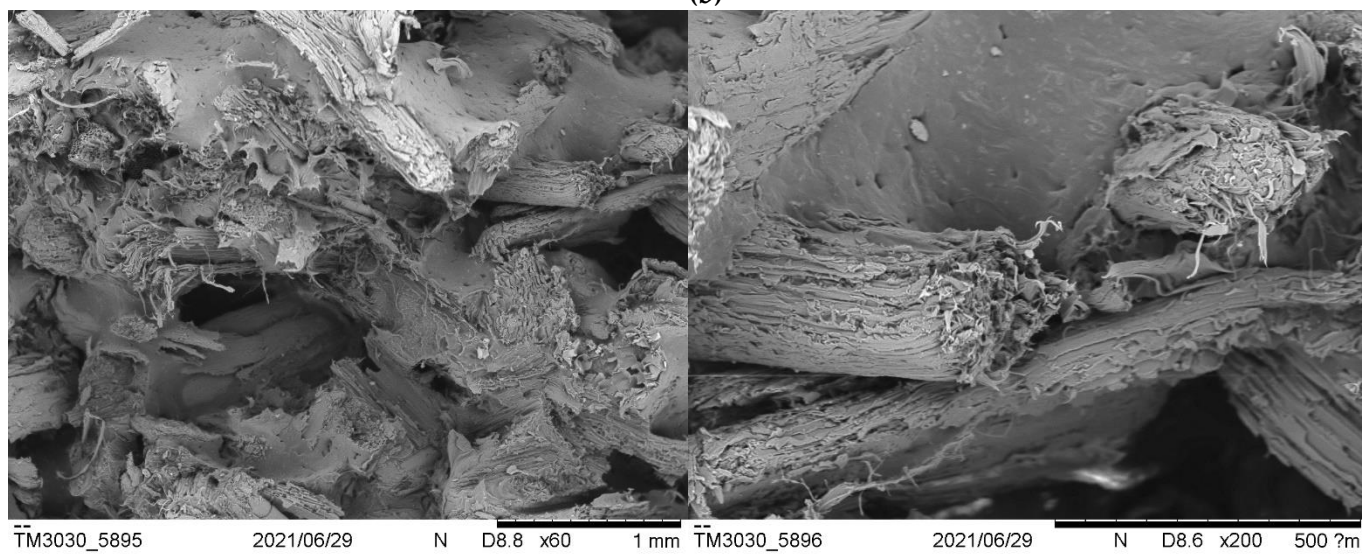

(c)

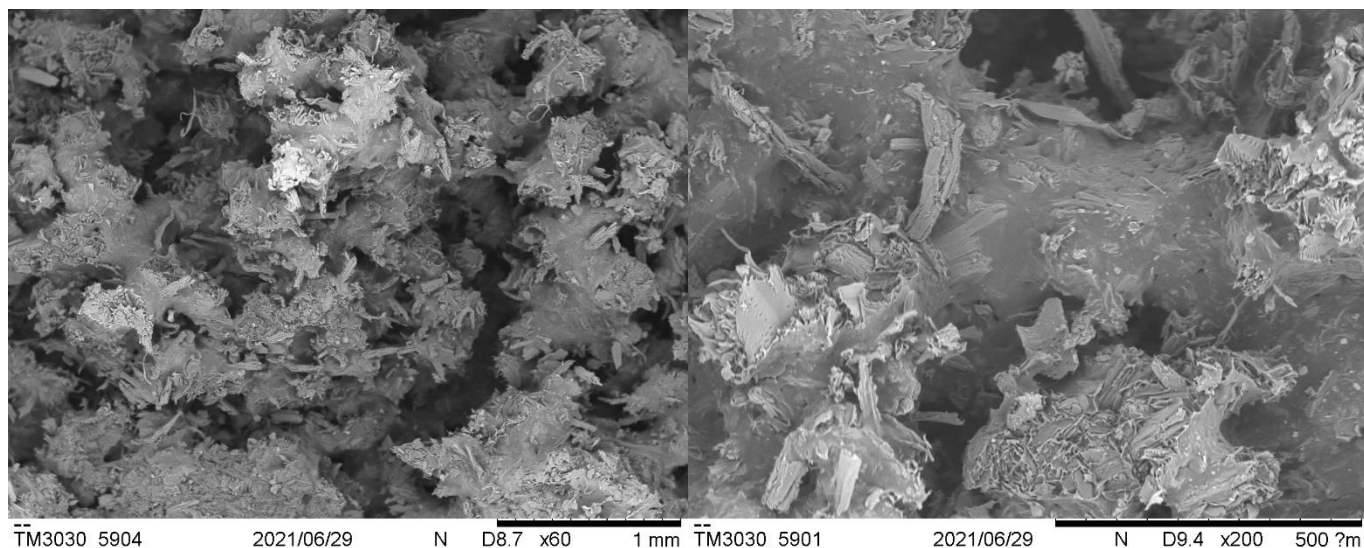

(d)

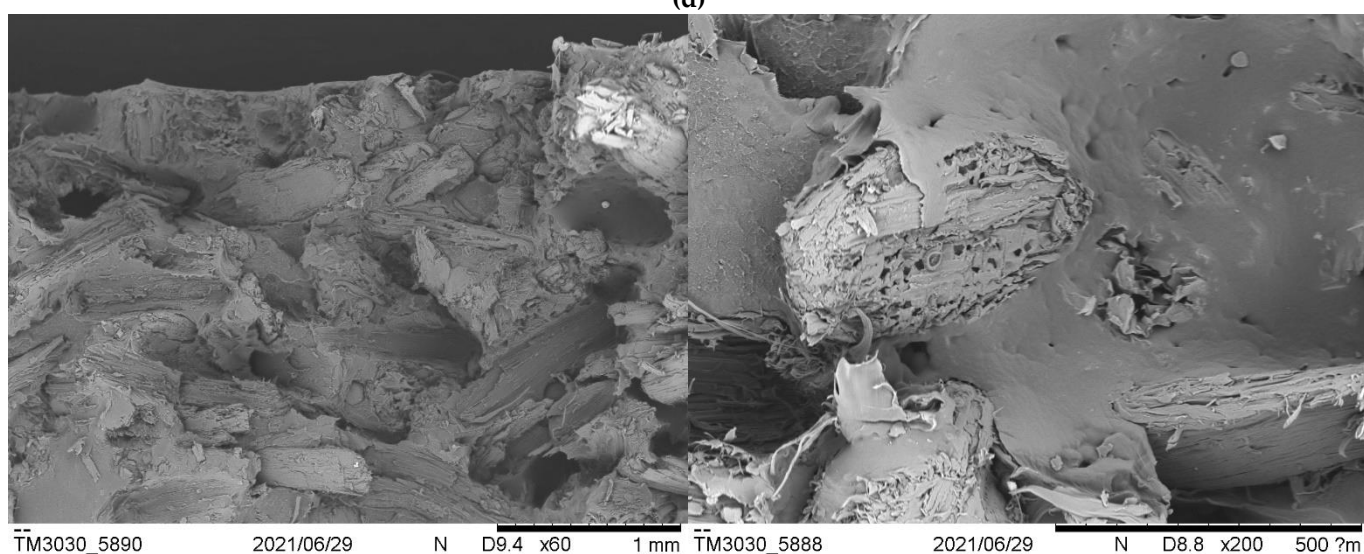

(e)

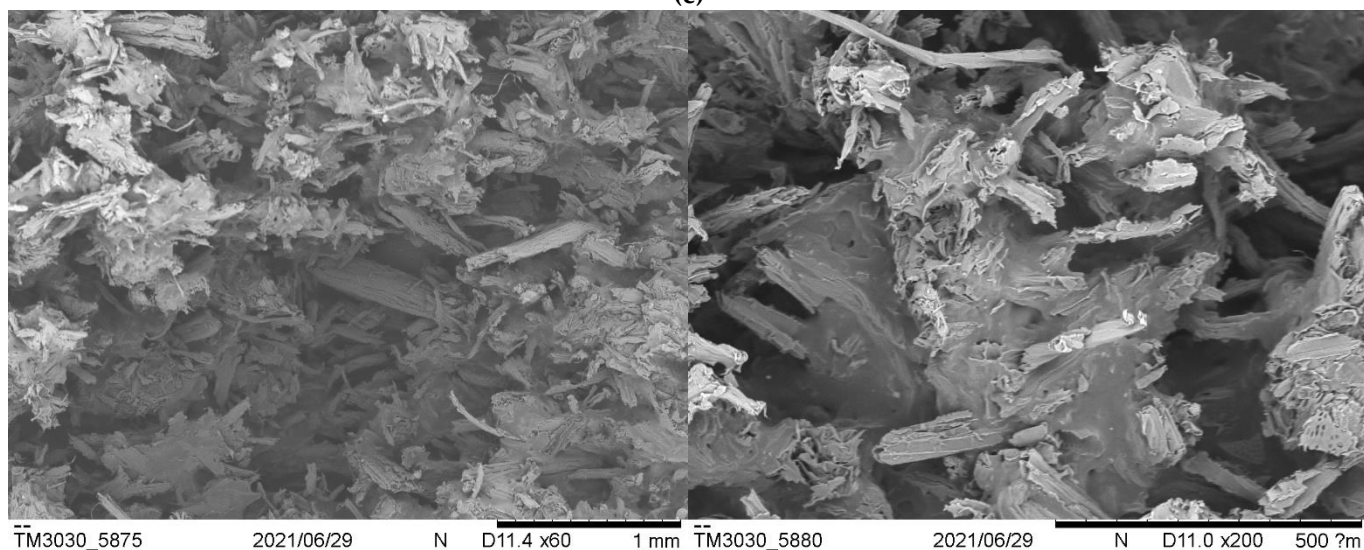

(f)

**Figure S3.** SEM pictures of *Ricinus communis* rotomolded composites: (a) 10 % unsieved fiber, (b) 10% unsieved treated fiber, (c) 20% A-fiber ( $> 250 \mu\text{m}$ ), (d) 20% D-fiber ( $< 75 \mu\text{m}$ ), (e) 20% A-treated fiber ( $> 250 \mu\text{m}$ ), (f) 20% D-treated fiber ( $< 75 \mu\text{m}$ )
